## REVIEW

## SARS-CoV-2 tropism, entry, replication, and propagation: Considerations for drug discovery and development

Nicholas Murgolo<sup>1\*</sup>, Alex G. Therien<sup>2</sup>, Bonnie Howell<sup>3</sup>, Daniel Klein<sup>4</sup>, Kenneth Koeplinger<sup>5</sup>, Linda A. Lieberman<sup>2</sup>, Gregory C. Adam<sup>6</sup>, Jessica Flynn<sup>3</sup>, Philip McKenna<sup>3</sup>, Gokul Swaminathan<sup>2</sup>, Daria J. Hazuda<sup>7</sup>, David B. Olsen<sup>3‡</sup>

**1** Department of Genetics and Pharmacogenomics, Merck & Co., Inc., Kenilworth, New Jersey, United States of America, **2** Exploratory Science Center, Merck & Co., Inc., Cambridge, Massachusetts, United States of America, **3** Department of Infectious Diseases and Vaccines, Merck & Co., Inc., West Point, Pennsylvania, United States of America, **4** Department of Computational and Structural Chemistry, Merck & Co., Inc., West Point, Pennsylvania, United States of America, **5** Department of Pharmacokinetics, Merck & Co., Inc., West Point, Pennsylvania, United States of America, **6** Department of Quantitative Biosciences, Merck & Co., Inc., West Point, Pennsylvania, United States of America, **7** Discovery Biology & Translational Medicine, Merck & Co., Inc., West Point, Pennsylvania, United States of America

‡ Senior author.

\* [nicholas.murgolo@merck.com](mailto:nicholas.murgolo@merck.com)

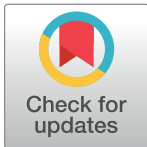

## OPEN ACCESS

**Citation:** Murgolo N, Therien AG, Howell B, Klein D, Koeplinger K, Lieberman LA, et al. (2021) SARS-CoV-2 tropism, entry, replication, and propagation: Considerations for drug discovery and development. *PLoS Pathog* 17(2): e1009225. <https://doi.org/10.1371/journal.ppat.1009225>

**Editor:** Tom C. Hobman, University of Alberta, CANADA

**Published:** February 17, 2021

**Copyright:** © 2021 Murgolo et al. This is an open access article distributed under the terms of the [Creative Commons Attribution License](https://creativecommons.org/licenses/by/4.0/), which permits unrestricted use, distribution, and reproduction in any medium, provided the original author and source are credited.

**Funding:** This work was supported by Merck Sharp & Dohme Corp., a subsidiary of Merck & Co., Inc., Kenilworth, NJ, USA. The authors are employees of Merck and Co., Inc., and were responsible for the study design, data collection and analysis, decision to publish, and preparation of the manuscript.

**Competing interests:** All authors are employees of Merck Sharp & Dohme Corp., a subsidiary of Merck & Co., Inc., Kenilworth, NJ, USA and may own stock or hold stock options in Merck & Co., Inc., Kenilworth, NJ, USA.

## Abstract

Since the initial report of the novel Coronavirus Disease 2019 (COVID-19) emanating from Wuhan, China, Severe Acute Respiratory Syndrome Coronavirus 2 (SARS-CoV-2) has spread globally. While the effects of SARS-CoV-2 infection are not completely understood, there appears to be a wide spectrum of disease ranging from mild symptoms to severe respiratory distress, hospitalization, and mortality. There are no Food and Drug Administration (FDA)-approved treatments for COVID-19 aside from remdesivir; early efforts to identify efficacious therapeutics for COVID-19 have mainly focused on drug repurposing screens to identify compounds with antiviral activity against SARS-CoV-2 in cellular infection systems. These screens have yielded intriguing hits, but the use of nonhuman immortalized cell lines derived from non-pulmonary or gastrointestinal origins poses any number of questions in predicting the physiological and pathological relevance of these potential interventions. While our knowledge of this novel virus continues to evolve, our current understanding of the key molecular and cellular interactions involved in SARS-CoV-2 infection is discussed in order to provide a framework for developing the most appropriate in vitro toolbox to support current and future drug discovery efforts.

## Introduction

Coronaviruses, named for their crown-like spiked surface, are genetically diverse and can infect multiple animal species, including bats, pigs, cats, rodents, and humans [1]. Coronaviruses are divided into 4 genera: alpha, beta, gamma, and delta. Only alpha and beta coronaviruses are known to infect humans, resulting in pathology ranging from upper respiratory

symptoms typical of the common cold to life-threatening lower respiratory disease. The common cold-causing coronaviruses 229E and OC43 were first discovered in the mid-1960s, with 2 additional coronaviruses, NL63 and HKU1, identified in 2004 and 2005, respectively. All are ubiquitous human pathogens [2]. From 2003 to mid-2019, 2 beta coronaviruses of zoonotic origin have caused outbreaks of severe respiratory disease: Severe Acute Respiratory Syndrome Coronavirus (SARS-CoV) and Middle East Respiratory Syndrome Coronavirus (MERS-CoV). SARS-CoV emerged in Asia in February 2003 and spread to 26 countries before the outbreak was contained [3,4]. Over 8,000 people were infected with a case fatality rate of approximately 10% [5]. MERS-CoV first appeared in 2012 with early cases emanating from Saudi Arabia and Jordan. Infections are still occurring and have been reported in 27 countries, with the majority of cases isolated to the Arabian Peninsula [6]. While human-to-human transmission for MERS-CoV is rare, the case fatality rate is greater than 30% [3,7].

In December 2019, an outbreak of fever and respiratory illness of unknown cause was reported in Wuhan, China [8], and by mid-January 2020, the etiologic agent had been identified as another newly emergent beta coronavirus, Severe Acute Respiratory Syndrome Coronavirus 2 (SARS-CoV-2) [9,10]. While many infected with SARS-CoV-2 are asymptomatic or develop mild disease, for others, COVID-19 may have potential long-term sequelae; and in vulnerable populations like the elderly and those with underlying medical conditions, it may cause significant morbidity and result in severe respiratory distress, hospitalization, and even death [11]. Since that time, SARS-CoV-2 has spread globally, prompting the World Health Organization (WHO) to declare the novel coronavirus disease, Coronavirus Disease 2019 or COVID-19, a pandemic in March 2020. In just 12 months, the virus has resulted in a major global health crisis with over 81 million COVID-19 cases across 190 countries, over 1,777,000 deaths, and an estimated case fatality rate of approximately 2.6% [12].

Aside from the intravenously administered antiviral drug remdesivir in patients with severe COVID-19 illness, there are no therapeutic agents approved for treatment of SARS-CoV-2 infection or disease [13]. A multicenter evaluation of 4 repurposed antiviral drugs (remdesivir, hydroxychloroquine, lopinavir, and interferon  $\beta$  1a) reported by WHO noted no effect on overall mortality initiation of ventilation and duration of hospital stay [14]. A recent subgroup analyses suggested that early glucocorticoid use in patients with markedly elevated C-reactive protein levels ( $\geq 20$  mg/dL) was associated with a significant reduction in mortality or mechanical ventilation, whereas glucocorticoid treatment in patients with lower C-reactive protein levels was associated with worse outcomes [15]. As the SARS-CoV-2 pandemic continues, there is an urgent need to develop effective therapeutics to limit further spread. Early attempts to identify efficacious therapeutics for COVID-19 have mainly focused on drug repurposing efforts wherein existing clinically advanced or marketed drugs are screened for antiviral activity against SARS-CoV-2 in vitro in cellular infection systems. While such screens have yielded intriguing hits, questions have arisen around the physiological and pathological relevance of infecting immortalized cell lines derived from non-pulmonary or gastrointestinal origins. Specific questions have arisen around the mechanisms of viral attachment and entry into human cells which may vary in cells from different tissue origins. In addition, screening cell lines may have limited intracellular machinery, such as catabolizing enzymes, which are a key component of the primary cell of infection in human patients. It is therefore of paramount importance to enhance our understanding of the key molecular and cellular interactions involved in SARS-CoV-2 infection in order to develop appropriate in vitro tools to support current and future drug discovery efforts.

## Scope/prior reviews

The purpose of this article is to review key aspects of SARS-CoV-2 biology, including determinants of virus entry into multiple cell lines and systems permissive for virus growth, tissue tropism, and host genes affecting viral entry, propagation, and nucleotide prodrug import and conversion for SARS-CoV-2, with the purpose of facilitating and enabling drug discovery efforts.

For a more comprehensive review of entry mechanisms and proteases processing in coronaviruses, the reader is directed to other recent articles [16–19]. Extensive reviews are available on MERS-CoV [20], SARS-CoV [21,22], and SARS-CoV-2 [19] inhibitors. We discuss SARS-CoV-2 repurposing screens in the “Entry mechanisms and proteases” section.

## Entry mechanisms and proteases

To date, initial screening to identify SARS-CoV-2 antivirals has largely utilized the Vero E6 African green monkey kidney cell line as the host cell for cytopathic effect (CPE) inhibition assays. In addition to being deficient in expression of angiotensin converting enzyme 2 (ACE2) and TMPRSS2, intrinsic nonspecific endocytic viral uptake mechanisms are responsible for viral entry in Vero E6 and a variety of other cell types [23–26]. Thus, a wide variety of molecules that modulate endosomal–lysosomal maturation and autophagy pathways have been found to exhibit potent antiviral activity in Vero E6 cells that may not translate to primary lung epithelial cells. This raises the possibility that the antiviral inhibition exhibited by many of these compounds against SARS-CoV-2 in Vero E6 screens could be an *in vitro* activity specific to highly endocytic cells and may not be relevant nor translatable as SARS-CoV-2 therapeutics. As further elaborated below, the SARS-CoV-2 virus has been demonstrated to deliver viral RNA directly across the plasma membrane without significant involvement of endocytic uptake.

Infection of mammalian lung epithelial cells by SARS-CoV-2, as well as by other coronaviruses, starts with binding of the virus through its spike protein to a specific receptor on the cell surface. The cellular receptor for SARS-CoV-2, and for the related virus SARS-CoV, is human ACE2 [16,27,28], which is expressed on epithelial cells of the lung and intestine, and to a lesser extent, in the kidney, heart, adipose, and both male and female reproductive tissues [29–35]. Binding to the receptor is followed by activation of the spike protein through proteolytic cleavage by a host protease near the junction between its S1 and S2 domains [17,36]. Insertion of the newly liberated S2 domain N-terminus into the cell membrane leads to fusion of the viral and cellular membranes, resulting in transfer of the viral RNA into the host cell cytoplasm where viral replication can occur [17,36].

While the steps outlined above are considered essential for infection of host cells by coronaviruses, this description omits key aspects of the viral entry process, namely the nature of the host protease(s) responsible for activating (or priming) the spike protein for fusion and the cellular location of the fusion event itself. Work on multiple coronaviruses over the last 20 years, and largely confirmed for SARS-CoV-2 within the last several months, shows that coronaviruses enter host cells through 1 of 2 distinct pathways: (i) the cell surface pathway following activation by serine proteases such as TMPRSS2; or (ii) the endocytic pathway within the endosomal–lysosomal compartments including processing by lysosomal cathepsins (Fig 1) [16–18]. A new study argues that coronaviruses use a lysosomal exocytosis pathway for release [37]. The contribution of each pathway in a given cell type depends largely on the expression of proteases, in particular TMPRSS2. When TMPRSS2 (or other serine proteases such as TMPRSS4 or human airway trypsin-like protease [HAT]) is expressed, the early entry pathway

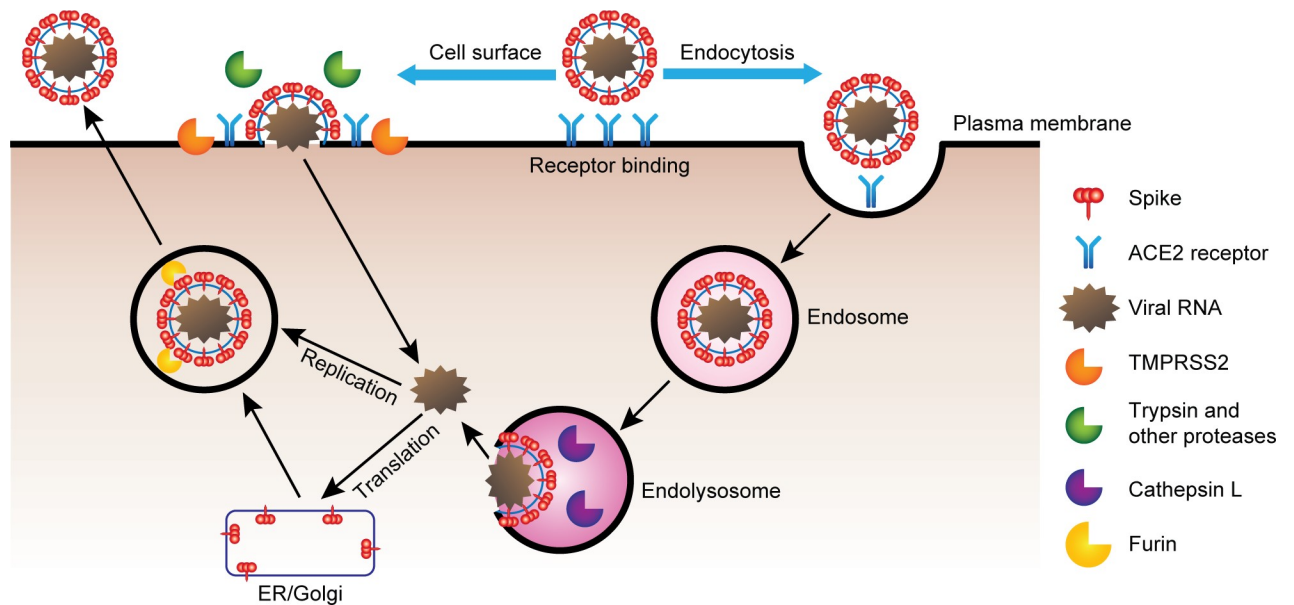

**Fig 1. SARS-CoV-2 entry mechanisms.** Viral coat spike protein binds to ACE2, and in some cases, perhaps NRP1, on responsive cells. Virus spike protein is either processed by TMPRSS2 and other serine proteases facilitating cell surface entry or endocytosed into endosomes where spike is processed by CTSL in the lysosome. Viral RNA released from TMPRSS2-mediated entry or endosome release is replicated as partial and complete genome copies and translated in the ER to form new SARS-CoV-2 virions. Processing of spike protein by furin occurs prior to release of new viruses into the extracellular environment. ACE2, angiotensin converting enzyme 2; CTSL, cathepsin L; ER, endoplasmic reticulum; NRP1, Neuropilin 1; SARS-CoV-2, Severe Acute Respiratory Syndrome Coronavirus 2.

<https://doi.org/10.1371/journal.ppat.1009225.g001>

is preferred, whereas in the absence of this protease, the virus relies on the late pathway involving endocytosis and activation by cathepsin L (CTSL) [27,38].

An understanding of which viral entry pathway is prevalent in specific cell types is paramount not only to understanding coronavirus biology, but also to the proper interpretation of cell-based genetic and small-molecule screens. To date, screens aimed at identifying marketed or clinically advanced drugs for potential repurposing for the treatment of COVID-19 have relied on the use of immortalized kidney epithelial cell lines such as Vero E6 (African green monkey) and 293T (embryonic human) [39–42]. Such screens have yielded multiple hits known to block or impair endocytosis or endosomal maturation [39,40,42,43]. This is not surprising since Vero E6 and 293T cells do not express the cell surface protease TMPRSS2; therefore, coronavirus infection in these cells is dependent on the late endocytic/cathepsin-mediated entry pathway. Thus, agents that interfere with this pathway, including cathepsin inhibitors, agents that prevent endosomal acidification (upon which the cathepsins are dependent for activity), and inhibitors of endosomal maturation (e.g., the PIKfyve inhibitor apilimod) can block viral entry in these cells [38,44,45]. Importantly, heterologous expression of TMPRSS2 in Vero E6 and HeLa cells abrogates the pharmacological efficacy of cathepsin inhibitors by enabling the cell surface viral entry pathway [38,46]. Similarly, pre-activation of virus with the serine protease trypsin also enables the cell surface entry pathway, even in cells that do not express TMPRSS2 [45,47,48]. Consistent with these observations, cells that express TMPRSS2 endogenously, including cells derived from the lung and intestinal epithelium, are also susceptible to coronavirus entry via the cell surface pathway. In these cells, cathepsin inhibitors are only partially effective, TMPRSS2 inhibitors such as camostat and nafamostat are significantly more effective, and a combination of the 2 types of protease inhibitors is maximally effective in preventing coronavirus infection [27,38,49–52]. These data suggest that

coronaviruses can enter these cells via both pathways, with a preference for the cell surface pathway.

These cellular data notwithstanding, it is still a matter of debate whether individual inhibition of the cell surface or endocytic pathways will provide therapeutic benefit against COVID-19. SARS-CoV-2 infects a broad variety of cell types [46,53,54], although it seems reasonable to surmise that epithelial cells of the respiratory and gastrointestinal tracts are among the first to encounter the virus in a clinical setting. In vivo studies with the related coronavirus SARS-CoV supports the notion that inhibitors of the cell surface entry pathway may be at least partially protective. Genetic [55] and pharmacological [56] blockade of TMPRSS2 provided partial protection against SARS-CoV in mouse models of infection. In the latter study, the broad cathepsin inhibitor SMDC256160 provided no benefit, either alone or in combination with camostat. Further studies will be required, particularly in SARS-CoV-2 infection models, to further define the contribution of each viral entry pathway to COVID-19 pathology. Notably, it has recently been proposed that SARS-CoV-2 entry blockade may require inhibition of both the cell surface and endocytic pathways [57].

### TMPRSS2 and furin in cell surface entry

The TMPRSS2 gene encodes a type II transmembrane serine protease (TTSP) that was originally discovered more than 2 decades ago [58] and subsequently shown to be regulated by androgen and highly expressed in prostate epithelium [59]. TMPRSS2 is localized to the plasma membrane via a single-pass transmembrane helix near its N-terminus. The enzyme can also undergo autocleavage at Arg255 yielding a 32-kDa secreted form of the protease [60]. Mice lacking the TMPRSS2-encoded protease (TMPRSS2<sup>-/-</sup>) show no discernable abnormal phenotype, suggesting that the protease does not serve an essential nonredundant function [61], an observation which enabled later investigation of TMPRSS2's role in mouse models of coronavirus disease.

Our current understanding of the relationship between TMPRSS2 and SARS-CoV-2 infection has seen rapid progress in the first few months since the emergence of SARS-CoV-2. Much of this advancement was built on more than a decade of studies beginning from the first evidence that TMPRSS2 expression correlates with SARS-CoV infection in lung tissue and leads to activation of the spike protein, enabling membrane fusion [62]. Studies using cell fusion assays indicated that TMPRSS2 expression on target cells, rather than virus producing cells, is critical for spike protein activation, supportive of spatial and temporal constraints on TMPRSS2 action at the plasma membrane during the early steps of cell surface viral entry. Two sites of cleavage on SARS-CoV spike—R667, located at the S1/S2 cleavage site, and R797, located at the S2' cleavage site—have been suggested to be relevant sites of action of TMPRSS2, as well as other serine proteases that can prime the spike protein in cell culture, such as trypsin and HAT. Mutation of R797 at S2' abrogates TMPRSS2-dependent activation of the spike protein, and this site is highly conserved across coronaviruses, suggesting that is functionally relevant to TMPRSS2-dependent cell surface entry in SARS-CoV-2.

The pro-protein convertase furin has long been known to play a role in viral entry, and recent data support a role of this enzyme, specifically in TMPRSS2-mediated cell surface entry. Processing of the spike protein by furin at the S1/S2 cleavage site is thought to occur following viral replication in the endoplasmic reticulum Golgi intermediate compartment (ERGIC) [63]. Underscoring the complex role of furin in viral fusion and entry, the S1/S2 furin cleavage site is present in SARS-CoV-2 and MERS but not in SARS-CoV [64]. Furthermore, the SARS-CoV-2 furin S1/S2 site is rapidly lost upon passaging in Vero E6 cells [65], and a milder SARS-CoV-2 strain isolate ZJ01 was demonstrated to have lost this site as well [30]. Furin can

also cleave the spike protein at the fusion activating the S2' site during biogenesis in MERS-CoV and SARS-CoV [30,36,65–67]. Overall, current available data support a plausible model for SARS-CoV-2 spike processing wherein furin-mediated cleavage at the S1/S2 site pre-primed the spike protein during biogenesis, facilitating subsequent activation for membrane fusion by a second cleavage event at S2' by TMPRSS2 following ACE2 receptor binding on target cells [46,50].

The VEGF-A receptor Neuropilin 1 (NRP1) was quite recently shown to be a host factor receptor for furin-cleaved SARS-CoV-2 spike peptide [68–71]. Blockade of NRP1 reduces infectivity and entry, and alteration of the furin site leads to loss of NRP1 dependence. Deletion of the furin peptide in spike leads to reduced replication in Calu3, augmented replication and improved fitness in Vero E6, and attenuated disease in a hamster pathogenesis disease model [70].

More recently, *in vivo* evidence for the relevance of TMPRSS2 in mouse models for SARS-CoV and MERS-CoV infection was provided from TMPRSS2(-/-) mice showing reduced disease severity [55]. TMPRSS2 shRNA knockdown studies provide evidence for a specific and nonredundant role in SARS-CoV-2 infection [72].

### Lysosomal cathepsins and endocytosis

While the evidence outlined above makes clear the role of TMPRSS2 and other serine proteases in activating the coronavirus spike protein for plasma membrane fusion, *in vitro* studies using various cell culture systems have demonstrated an alternative endosomal-lysosomal pathway for viral entry. Early studies demonstrated the sensitivity of SARS-CoV replication in cell culture to lysosomotropic agents, followed by additional studies dissecting the role of cathepsins for processing and activating the spike for membrane fusion. The availability of highly potent and specific small-molecule cathepsin inhibitors was key to dissecting the molecular events involved in this pathway and ascribing the relevant functional effect to CTSL, 1 of 11 cathepsins in humans [73,74]. Additional studies localized the site of CTSL cleavage on SARS-CoV spike protein to T678, 11 amino acids carboxyl terminus to R667 of the furin cleavage site. The observation that the CTSL cleavage site is located 120 amino acids upstream of the S2' site cleaved by TMPRSS2 exposes a gap in our understanding of the molecular events involved in the endosomal entry pathway. Previous studies suggested the possibility of another protease that may cleave at S2' in the low pH environment of endosomes/lysosomes to fully activate the membrane fusion potential of the spike [36], or alternatively, differences in lipid composition between plasma membranes and endosomal/lysosomal membranes may render the latter more amenable to viral fusion [75]. Despite this discrepancy in our current understanding of endocytic viral entry, it is clear that coronaviruses in general, and SARS-CoV-2 in particular, are capable of establishing robust infection through endosomal entry in commonly used *in vitro* cell culture systems.

### Cell line tropism/expression

With the complexity of multiple entry mechanisms of SARS-CoV-2, selection of optimal cell line(s) for compound evaluation and screening is imperative, especially in studies looking for broad antiviral mechanisms of action beyond inhibition of the viral nonstructural proteins. Toward this end, studies to better understand the cellular tropism of the virus have been reported. A Vesicular Stomatitis Virus (VSV) pseudotyped virus bearing SARS-CoV-2 spike protein or SARS-CoV spike protein and a panel of well-characterized human and animal cell lines was used to determine the broader tropism of the virus [46]. The spectrum of cell lines susceptible to virus infection was similar for SARS-CoV and SARS-CoV-2 spike protein with

entry supported in A549, BEAS-2B, Calu-3, H1299, 293T, Huh7, Caco-2, Vero E6, and MDCK2 cell types [27]. Additional efforts to understand viral tropism included monitoring the infectivity of virus for 120 hours with 0.1 multiplicity of infection (MOI) of SARS-CoV-2 HKU-001a across a panel of 9 human and 11 nonhuman cell lines [53]. Similar to the results observed with a pseudotyped virus, the most robust infection among the human cell lines was observed for Calu-3 (pulmonary) and Caco-2 (intestinal) cells with infection also observed in Huh7 (hepatic), 293T (renal), and to a lesser extent, U251 (neuronal) cells. Among the 11 cell types found permissive to infection in the study, CPE was observed 120 hours postinfection only in Vero E6 and FRhK4 (rhesus kidney), with damage including cell rounding, detachment, degeneration, and syncytium formation. Even up to 7 days postinfection, CPE was not observed in Calu-3, Caco 2, LLCMK2, PK-15, and RK-13 cells with SARS-CoV-2.

At a higher MOI of one, a study of proteomics kinetic changes on infection showed both viral replication and CPE in Caco-2 cells [76]. By monitoring protein expression levels, the authors of this study observed that infection results in the reshaping of central cellular pathways, such as translation, splicing, carbon metabolism, and nucleic acid metabolism. This assay was modified by lowering the MOI from 1 to 0.01 and increasing incubation time from 24 to 48 hours to allow for several cycles of viral replication to screen for antivirals in a high-content imaging assay [77]. From a screen of 5,632 compounds including greater than 3,400 clinical candidates, the authors highlighted 6 compounds which had previously been reported to be active against SARS-CoV-2, SARS-CoV, or MERS in antiviral assays in Vero E6, Calu-3, or BHK21 (hamster kidney fibroblast) cells, with the pattern of inhibition matching more closely to results in human Calu-3 cells than in nonhuman Vero E6 and BHK21 cells. For example, camostat and nafamostat, inhibitors of TMPRSS2, which plays a role in the cell surface pathway for viral cellular entry, were measured to be 100x more potent against SARS-CoV-2 in Caco-2 cells than in Vero E6 cells. However, compounds like remdesivir, lopinavir, and mefloquine were relatively consistent across cell types.

Further delineating the different mechanisms involved in SARS-CoV-2 entry and infection, Dittmar and colleagues applied a high-content imaging assay to compare the antiviral activity of a panel of approximately 3,000 compounds [39]. Less than 1% infection was observed in several cell types including A549, Calu-1, Huh7, HepG2, HaCaT, IMR90, NCI-H292, CFBE41o, and U2OS cells; however, robust infection was observed in the human hepatocyte cell line Huh7.5, lung-derived Calu-3 cells, and Vero CCL81 cells. Among the 3 cell types, compounds with different mechanisms of action were observed to have variable antiviral activity. For example, inhibitors of endosomal entry, such as the cathepsin inhibitor Z-FA-FMK and PIKfyve inhibitor apilimod, were active in Huh7.5 and Vero E6 cells but not Calu-3 cells. In contrast, camostat, an inhibitor of the plasma membrane protease TMPRSS2, was active in Calu-3 cells but not Huh7.5 and Vero E6 cells, further highlighting the importance of understanding the translatability of a cellular model of infection.

Viral tropism of SARS-CoV-2 for various cell types likely reflects differential expression of key host proteins involved in viral attachment and entry. Table 1 summarizes publicly available expression data for the SARS-CoV-2 cellular receptor ACE2 and for 5 proteases involved in viral fusion and entry (furin, TMPRSS2, CTSL, elastase, and trypsin). While CTSL is expressed in all lines examined, ACE2 and TMPRSS2 levels vary, explaining the use of heterologous expression of these genes in prior studies involving Vero E6 and other cell lines.

### Nucleotide/side import and conversion

Screening cell lines for evaluation of nucleotide prodrugs and nucleosides as inhibitors of viral RNA-dependent RNA polymerase (RdRp) must consider their ability to import and convert

**Table 1. Cell line expression level of ACE2 receptor and 5 proteases.**

| Cell line | Species | Tissue                         | NCBI GEO GSM | ACE2 | Furin | TMPRSS2 | CTSL | Elastase | Trypsin |      |     |
|-----------|---------|--------------------------------|--------------|------|-------|---------|------|----------|---------|------|-----|
| Vero E6   | AGM     | Kidney                         | GSM758842    |      |       |         |      |          |         |      |     |
| T84       | Human   | Colon                          | GSM24844     |      |       |         |      |          |         |      |     |
| Calu3     | Human   | Lung epithelial adenocarcinoma | GSM98974     |      |       |         |      |          |         |      |     |
| Caco2     | Human   | Colorectal adenocarcinoma      | GSM24832     |      |       |         |      |          |         |      |     |
| Huh7      | Human   | Liver carcinoma                | GSM523816    |      |       |         |      |          |         |      |     |
| 293T      | Human   | Kidney embryonic               | GSM871735    |      |       |         |      |          |         |      |     |
| U251      | Human   | Glioblastoma                   | GSM803750    |      |       |         |      |          |         |      |     |
| FRhK4     | AGM     | Kidney                         | GSM871739    |      |       |         |      |          |         |      |     |
| LLCMK2    | AGM     | Kidney                         | GSM871737    |      |       |         |      |          |         |      |     |
| BEAS-2B   | Human   | Lung bronchial epithelial      | GSM157034    |      |       |         |      |          |         |      |     |
| H1299     | Human   | Lung NSCLC metastasis          | GSM98990     |      |       |         |      |          |         |      |     |
| A549      | Human   | Lung epithelial adenocarcinoma | GSM2359842   |      |       |         |      |          |         |      |     |
| Calu1     | Human   | Lung bronchial epithelial      | GSM1374431   |      |       |         |      |          |         |      |     |
| HepG2     | Human   | Liver carcinoma                | GSM720616    |      |       |         |      |          |         |      |     |
| MRC5      | Human   | Lung fibroblast                | GSM654536    |      |       |         |      |          |         |      |     |
| CRFK      | Cat     | Kidney                         | GSM3553405   |      |       |         |      |          |         |      |     |
| 16HBE     | Human   | Bronchial epithelial           | GSM417467    |      |       |         |      |          |         |      |     |
| HUVEC     | Human   | Vein epithelial                | GSM385333    |      |       |         |      |          |         |      |     |
|           |         | Expression                     |              | High | 12.00 | 9.60    | 7.20 | 4.80     | 2.40    | 0.00 | Low |

Values are normalized log 2 expression with data obtained from NCBI Gene Expression Omnibus database (<http://www.ncbi.nlm.nih.gov/geo/>) [93].

ACE2, angiotensin converting enzyme 2; AGM, African green monkey; CTSL, cathepsin L; NSCLC, non-small cell lung cancer.

<https://doi.org/10.1371/journal.ppat.1009225.t001>

compounds to active nucleoside triphosphate (NTP) metabolites [78]. Remdesivir [79–81] is a phosphoramidate prodrug [82] requiring import and conversion in host cells to inhibit the replication essential SARS-CoV-2 RdRp.

Cellular uptake of modified nucleosides largely depends on expression of concentrative membrane transporters (cNTs) or equilibrative/facilitative membrane transporters (ENTs) [83,84]. Intracellular conversion to nucleosides to nucleotides is mediated by cellular kinase phosphorylation, and deficient expression can reduce antiviral potency [39,85,86].

Some prodrugs require expression and enzymatic conversion by esterases and lysosomal cathepsin A.

We therefore tested 5 cell lines for ability to phosphorylate adenosine ribonucleosides MK-0608 and GS-441524 (parent nucleoside of remdesivir) compared with remdesivir prodrug GS-5734 and demonstrated that host cells have differential capability for drug activation (Fig 2). Hepatocyte cell lines HepG2 and Huh7 exhibited significantly better activation of mono-phosphate phosphoramidite prodrug GS-5734 than African green monkey Vero E6 kidney cells, Crandell-Rees feline kidney (CRFK) cells, or human Calu-3 lung cells due to increased cathepsin A expression in hepatocytes compared with extrahepatic cells [87].

### Primary cells/model systems

Cell lines provide a rapid method to screen and gather data in a high-throughput manner, but there are limitations in their translatability. Primary cell culture systems may more accurately model relevant cellular physiology. Insight into the SARS-CoV-2 course of infection has been gleaned using single cell sequencing results from the Human Atlas (noninfected individuals) to identify transcriptional expression of viral receptors. Protein staining of these receptors is a



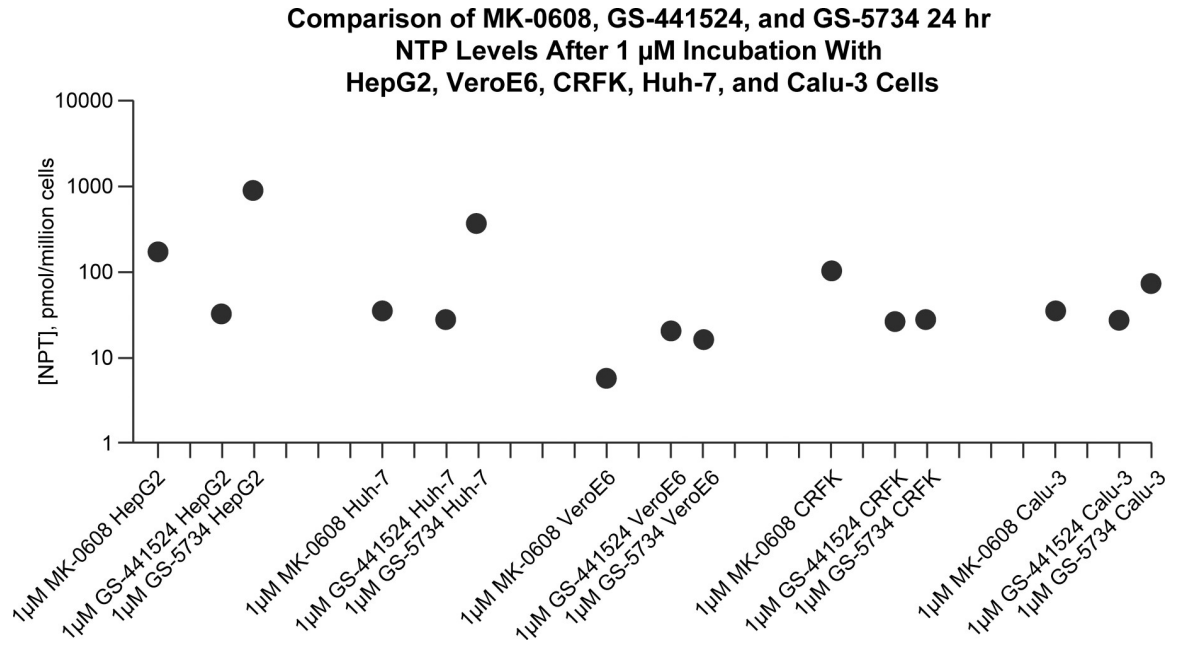

**Fig 2. Nucleotide phosphorylation.** The 24-hour intracellular NTP concentration of adenosine antiviral drug leads (MK-0608, Gilead Sciences remdesivir prodrug GS-5734, and Gilead Sciences remdesivir parent nucleoside GS-441524) after incubation at 1  $\mu$ M illustrates the apparent deficiency of Vero E6 cells with regard to conversion to the active triphosphate form as compared to other cell lines studied. NTP, nucleoside triphosphate.

<https://doi.org/10.1371/journal.ppat.1009225.g002>

better indicator of actual surface expression, but such data are currently sparse. Analysis of RNA from infected patient tissue samples provides a snapshot in time for which we often do not know the timing of the onset of infection. Primary in vitro model systems allow for the testing of hypotheses in human tissues and allow us to gather temporal information about gene/protein expression.

Many studies have reported high levels of ACE2 and TMPRSS2 co-expression in lung AT2 cells utilizing data from public databases and lung resections [29,88,89]. Lung air-liquid interface (ALI) cultures derived from various regions of the lung from healthy individuals showed the greatest co-expression of ACE2 and TMPRSS2 in transient secretory cells of the bronchial branches. It was also shown that there is triple expression of ACE2, TMPRSS2, and FURIN when looking across lung tissue, with a preference for co-expression of at least 2 of the receptors [29]. In a recent study, single cell (sc) RNA sequencing (seq) was used to follow viral RNA on a per cell basis over a time course of infected bronchial epithelial cells (ALI model) and found that the primary target of SARS-CoV-2 in the upper airway is ciliated lung cells, the cells responsible for removing mucus and foreign particles from the lung. As infection progresses, the virus infected basal and club cells over time, which they confirmed using electron microscopy. Additionally, an up-regulation was observed of type I and type III interferons (IFNs), IL-6, and the chemokines CXCL9, CXCL10, and CXCL11 (important for recruitment of T/NK cells) in infected cells and broad interferon-stimulated gene (ISG) up-regulation in infected cells as well as bystander cells [90]. While these single cell sequencing and single nucleus sequencing data provide much detail about the expression of RNA transcripts, an older study confirms co-staining of ACE2 and TMPRSS2 protein in lung sections by immunohistochemistry [91].

In contrast, others have reported that nasal epithelial cells have the highest expression of ACE2 in the respiratory tract. Additionally, by combing publicly available databases, it was

found that the upper airway has the highest expression of ACE2-correlated genes, and genes with innate immune function are disproportionately represented [92]. Specifically, they reported that the nasal goblet cells have the highest expression of these immune genes.

While lung ALI cultures represent a more physiologically relevant primary model due to the exposure of the apical membrane to air, lung organoids have utility in studying SARS-CoV-2. Similar to lung ALI cultures, lung organoids are derived from basal stem cells of the lung (adult) or induced pluripotent stem cells (embryonic) and are grown in a 3D supportive matrix [93]. A benefit of using organoid cultures is that the stem cells can be propagated continuously and then terminally differentiated into more mature cell types of the epithelium allowing for more rapid expansion and differentiation of primary cells to numbers high enough to support higher throughput screening compared with ALI cultures, which take 21 to 28 days to reach maturity. One group reported using lung organoids to successfully screen the Food and Drug Administration (FDA)-approved Prestwick drug library with a luciferase-expressing SARS-CoV-2 pseudovirus [94]. Additionally, they confirmed 3 out of 4 hits in hPSC-derived colonic organoids.

While the mucosal surface is likely the entry site for SARS-CoV-2, examination of other tissues has revealed that high levels of ACE2/TMPRSS2 co-expression are present in the enterocytes of the ileum and colon, and the gut may have higher expression of these receptors than the lung [30,31]. The observation that some COVID-19 patients have gastrointestinal distress prior to developing respiratory symptoms as well as during disease progression may suggest a fecal-oral route of transmission [95,96]; evidence supporting this has been recently reviewed [97,98]. Similarly, gastrointestinal infection/distress was previously observed for the closely related SARS and MERS coronaviruses [99,100]. The transcriptional data are supported by endoscopic samples from a COVID-19 patient (esophagus, stomach, duodenum, and rectum) that displayed staining of the ACE2 receptor in the gastrointestinal epithelial cells, but not in the esophageal epithelium [101].

Studies have linked the observed gastrointestinal phenotype to the expression of ACE2+/TMPRSS2+ cells in the gut, with highest expression levels in the ileum, followed by the colon. More conclusively, infection of intestinal organoids with SARS-CoV-2 was successful, and they supported replication of the virus with enterocytes being the primary cell type targeted [31]. Interestingly, it was observed that type III IFN, but not type I IFN, was up-regulated following infection of colonoids with SARS-CoV-2, suggesting that this cytokine may play a protective role in this infection [102].

The intestinal organoid model has allowed further characterization of viral entry. Using a VSV-SARS-CoV-2 pseudovirus (expressing the SARS-CoV-2 spike protein), it was demonstrated that TMPRSS2 and TMPRSS4 are both necessary for fusogenic entry into duodenal enterocytes [103]. Additionally, the authors observed preferential infection of the apical membrane of the enterocytes, and imaging suggested polarized viral assembly and release from the apical membrane. These data demonstrate how data from primary cells/tissue can be further dissected when replicated in a physiologically relevant primary model system. The use of primary lung and gut model systems is proving to be very relevant for the study for SARS-CoV-2 as they more accurately replicate receptor expression and possibly the physiological responses seen in vivo.

It should be noted that other ex vivo systems, such as tissue explants, have been used to study viral respiratory infections and could likely be used to study SARS-CoV-2. Multispecies in vivo models are also rapidly being developed to better understand host responses to this virus. In vivo and ex vivo models that have been or are under development have recently been reviewed, including mouse, ferret, hamster, and nonhuman primate animal models [104,105].

## Innate immune cells

Immune dysfunction has been extensively characterized in COVID-19 patients, such as dysregulation of T cells, B-cells, and innate immune cells [106,107]. Specifically, increased prevalence and activation of innate immune cells has been observed in COVID-19 patients with severe disease [108]. Interestingly, it was reported that there are significant morphological and functional differences in monocytes derived from COVID-19 patients compared with healthy human donors [109]. Postmortem analyses of secondary lymphoid organs from COVID-19 patients have confirmed the expression of ACE2 receptor and the presence of SARS-CoV-2 nucleoprotein in CD169+ macrophages [110]. However, it is unclear if SARS-CoV-2 can infect and replicate in innate immune cells.

Varying degrees of viral entry and replication have been observed in primary innate immune cells infected with SARS-CoV-1, MERS-CoV, HCoV-OC43, and HCoV 229E [111]. Minimal expression of key receptors required for SARS-CoV-2 entry, including ACE2 and TMPRSS2 in innate immune cells such as monocytes and macrophages, has been recently reported in nonhuman primates [112] and humans [30]. In addition, monocytes can express high levels of CD147 [113], a potential receptor for SARS-CoV-2 entry [114].

Two recent publications have identified that CD14+ primary monocytes from healthy human donors are readily susceptible to SARS-CoV-2 infection. Pontelli and colleagues demonstrated this by infecting primary human monocytes *ex vivo* with SARS-CoV-2 and measuring viral antigens and dsRNA entities in infected cells [115]. They observed substantial reduction in viral entry when monocytes were infected in the presence of ammonium chloride, which suggested that the endocytic pathway is likely important. Similarly, Codo and colleagues observed infection of SARS-CoV-2 in primary human monocytes based on measurement of viral transcripts by qPCR [116]. Furthermore, they observed that SARS-CoV-2 infection of monocytes results in induction of glycolysis and increase in transcript levels of several genes including the main viral entry receptor ACE2.

Given the minimal expression of ACE2 receptor in monocytes, these observations are rather surprising. More in-depth virologic analyses of productive replication in monocytes will greatly bolster the observations in these 2 aforementioned publications. Furthermore, additional studies are needed to better understand if (i) monocytes/macrophages are exposed to SARS-CoV-2 via direct infection via ACE2 binding or through phagocytosis; (ii) ACE2 is induced in infected monocytes and bystander cells through secretion of inflammatory mediators; and (iii) expression of additional host entry receptors such as CD147 and Neuropilin-1 may be expressed in monocytes to facilitate infection in an ACE2-independent manner [69].

Continued evaluation of the susceptibility of innate immune cells to SARS-CoV-2 will greatly improve our current understanding of SARS-CoV-2-host interactions as well as the immunopathogenesis observed in COVID-19 patients.

## Concluding remarks

Phenotypic screening to identify novel inhibitors for infectious diseases is a costly and time-consuming endeavor. The most important decisions are the choice of cell line or model systems in which to conduct the screen and the availability of relevant secondary screens to eliminate irrelevant hits and prioritize those of potential interest. In this regard, assessing antiviral potency for SARS-CoV-2 viral replication should take into account the following key considerations. Expression of the ACE2 receptor and key host proteases will influence the nature of hits identified [117]. Screens in Vero E6 cells have identified agents affecting the endocytic pathway as having antiviral activity, but blockade of both endocytic and cell surface viral entry pathways may be required in the context of clinical infection. In addition to understanding the

viral entry pathway(s) which SARS-CoV-2 uses in the specific cell types used for screening, consideration should be given to the degree of nucleotide prodrug activation and phosphorylation observed in the in vitro screening system, as clearly demonstrated recently [39]. Emerging model systems including ALI and organoid cultures are promising host mimetic systems for evaluating candidates, although these have their own limitations. Finally, the potential role of innate immune cells in infection is an additional important consideration. Selecting appropriate in vitro model systems reflecting multiple aspects of SARS-CoV-2 biology will be essential to optimize success in current and future drug discovery efforts.

## Acknowledgments

Mary E Hanson, PhD of Merck Sharp & Dohme Corp., a subsidiary of Merck & Co., Inc., Kenilworth, New Jersey, USA, provided medical writing support; and Carol Zecca and Karyn Davis, of Merck Sharp & Dohme Corp., a subsidiary of Merck & Co., Inc., Kenilworth, New Jersey, USA, provided editorial and submission support.

## References

1. Weiss SR. J Exp Med. Forty years with coronaviruses, 2020; 217. <https://doi.org/10.1084/jem.20200537> PMID: 32232339
2. Corman VM, Muth D, Niemeyer D, Drosten C. Hosts and Sources of Endemic Human Coronaviruses. *Adv Virus Res.* 2018; 100:163–88. <https://doi.org/10.1016/bs.aivir.2018.01.001> PMID: 29551135
3. Graham RL, Baric RS. Recombination, reservoirs, and the modular spike: mechanisms of coronavirus cross-species transmission. *J Virol.* 2010; 84:3134–46. <https://doi.org/10.1128/JVI.01394-09> PMID: 19906932
4. Li W, Shi Z, Yu M, Ren W, Smith C, Epstein JH, et al. Bats are natural reservoirs of SARS-like coronaviruses. *Science.* 2005; 310:676–9. <https://doi.org/10.1126/science.1118391> PMID: 16195424
5. Kamps BS, Hoffmann C. Flying Publisher.
6. WHO. 2020.
7. Cui J, Li F, Shi ZL. Origin and evolution of pathogenic coronaviruses. *Nat Rev Microbiol.* 2019; 17:181–92. <https://doi.org/10.1038/s41579-018-0118-9> PMID: 30531947
8. Zhou Z, Ren L, Zhang L, Zhong J, Xiao Y, Jia Z, et al. Heightened Innate Immune Responses in the Respiratory Tract of COVID-19 Patients. *Cell Host Microbe.* 2020. <https://doi.org/10.1016/j.chom.2020.04.017> PMID: 32407669
9. Coronaviridae Study Group of the International Committee on Taxonomy of Viruses. The species Severe acute respiratory syndrome-related coronavirus: classifying 2019-nCoV and naming it SARS-CoV-2. *Nat Microbiol.* 2020; 5:536–44. <https://doi.org/10.1038/s41564-020-0695-z> PMID: 32123347
10. Hui DS, Azhar EI, Madani TA, Ntoumi F, Kock R, Dar O, et al. The continuing 2019-nCoV epidemic threat of novel coronaviruses to global health—The latest 2019 novel coronavirus outbreak in Wuhan, China. *Int J Infect Dis.* 2020; 91:264–6. <https://doi.org/10.1016/j.ijid.2020.01.009> PMID: 31953166
11. Huang C, Wang Y, Li X, Ren L, Zhao J, Hu Y, et al. Clinical features of patients infected with 2019 novel coronavirus in Wuhan, China. *Lancet.* 2020; 395:497–506. [https://doi.org/10.1016/S0140-6736\(20\)30183-5](https://doi.org/10.1016/S0140-6736(20)30183-5) PMID: 31986264
12. Dong E, Du H, Gardner L. An interactive web-based dashboard to track COVID-19 in real time. *Lancet Infect Dis.* 2020; 20:533–4. [https://doi.org/10.1016/S1473-3099\(20\)30120-1](https://doi.org/10.1016/S1473-3099(20)30120-1) PMID: 32087114
13. Srinivas P, Sacha G, Koval C. Antivirals for COVID-19. *Cleve Clin J Med.* 2020. <https://doi.org/10.3949/ccjm.87a.ccc030> PMID: 32409433
14. WHO Solidarity Trial Consortium, Pan H, Peto R, Henao-Restrepo A-M, Preziosi M-P, Sathiyamoorthy V, et al. Repurposed antiviral drugs for COVID-19—interim WHO SOLIDARITY trial results. *medRxiv.* 2020. <https://doi.org/10.1056/NEJMoa2023184> PMID: 33264556
15. Keller MJ, Kitsis EA, Arora S, Chen J-T, Agarwal S, Ross MJ, et al. Effect of Systemic Glucocorticoids on Mortality or Mechanical Ventilation in Patients With COVID-19. *J Hosp Med.* 2020. <https://doi.org/10.12788/jhm.3497> PMID: 32804611
16. Yang N, Shen HM. Targeting the Endocytic Pathway and Autophagy Process as a Novel Therapeutic Strategy in COVID-19. *Int J Biol Sci.* 2020; 16:1724–31. <https://doi.org/10.7150/ijbs.45498> PMID: 32226290

17. Millet JK, Whittaker GR. Physiological and molecular triggers for SARS-CoV membrane fusion and entry into host cells. *Virology*. 2018; 517:3–8. <https://doi.org/10.1016/j.virol.2017.12.015> PMID: 29275820
18. Tang T, Bidon M, Jaimes JA, Whittaker GR, Daniel S. Coronavirus membrane fusion mechanism offers a potential target for antiviral development. *Antivir Res*. 2020; 178:104792. <https://doi.org/10.1016/j.antiviral.2020.104792> PMID: 32272173
19. Xiu S, Dick A, Ju H, Mirzaie S, Abdi F, Cocklin S, et al. Inhibitors of SARS-CoV-2 Entry: Current and Future Opportunities. *J Med Chem*. 2020. <https://doi.org/10.1021/acs.jmedchem.0c00502> PMID: 32539378
20. Liang R, Wang L, Zhang N, Deng X, Su M, Su Y, et al. Development of Small-Molecule MERS-CoV Inhibitors. *Viruses*. 2018; 10:721. <https://doi.org/10.3390/v10120721> PMID: 30562987
21. Tong TR. Therapies for coronaviruses. Part I of II—viral entry inhibitors. *Expert Opin Ther Pat*. 2009; 19:357–67. <https://doi.org/10.1517/13543770802609384> PMID: 19449500
22. Tong TR. Therapies for coronaviruses. Part 2: Inhibitors of intracellular life cycle. *Expert Opin Ther Pat*. 2009; 19:415–31. <https://doi.org/10.1517/13543770802600698> PMID: 19441924
23. Mercer J, Helenius A. Virus entry by macropinocytosis. *Nat Cell Biol*. 2009; 11:510–20. <https://doi.org/10.1038/ncb0509-510> PMID: 19404330
24. Aleksandrowicz P, Marzi A, Biedenkopf N, Beimforde N, Becker S, Hoenen T, et al. Ebola virus enters host cells by macropinocytosis and clathrin-mediated endocytosis. *J Infect Dis*. 2011; 204(Suppl 3): S957–67. <https://doi.org/10.1093/infdis/jir326> PMID: 21987776
25. Saeed MF, Kolokoltsov AA, Albrecht T, Davey RA. Cellular entry of ebola virus involves uptake by a macropinocytosis-like mechanism and subsequent trafficking through early and late endosomes. *PLoS Pathog*. 2010; 6:e1001110. <https://doi.org/10.1371/journal.ppat.1001110> PMID: 20862315
26. de Vries E, Tscherne DM, Wienholts MJ, Cobos-Jiménez V, Scholte F, García-Sastre A, et al. Dissection of the influenza A virus endocytic routes reveals macropinocytosis as an alternative entry pathway. *PLoS Pathog*. 2011; 7:e1001329. <https://doi.org/10.1371/journal.ppat.1001329> PMID: 21483486
27. Hoffmann M, Kleine-Weber H, Schroeder S, Krüger N, Herrler T, Erichsen S, et al. SARS-CoV-2 Cell Entry Depends on ACE2 and TMPRSS2 and Is Blocked by a Clinically Proven Protease Inhibitor. *Cell*. 2020; 181:271, e278–80. <https://doi.org/10.1016/j.cell.2020.02.052> PMID: 32142651
28. Wrapp D, Wang N, Corbett KS, Goldsmith JA, Hsieh C-L, Abiona O, et al. Cryo-EM structure of the 2019-nCoV spike in the prefusion conformation. *Science*. 2020; 367:1260–3. <https://doi.org/10.1126/science.abb2507> PMID: 32075877
29. Lukassen S, Chua RL, Trefzer T, Kahn NC, Schneider MA, Muley T, et al. SARS-CoV-2 receptor ACE2 and TMPRSS2 are primarily expressed in bronchial transient secretory cells. *EMBO J*. 2020; 39:e105114. <https://doi.org/10.15252/emboj.20105114> PMID: 32246845
30. Zhang H, Kang Z, Gong H, Xu D, Wang J, Li Z, et al. Digestive system is a potential route of COVID-19: an analysis of single-cell coexpression pattern of key proteins in viral entry process. *Gut*. 2020; 69:1010–8. <https://doi.org/10.1136/gutjnl-2020-320953>
31. Lamers MM, Beumer J, van der Vaart J, Knoops K, Puschhof J, Breugem TI, et al. SARS-CoV-2 productively infects human gut enterocytes. *Science*. 2020. <https://doi.org/10.1126/science.abc1669> PMID: 32358202
32. Chen L, Li X, Chen M, Feng Y, Xiong C. The ACE2 expression in human heart indicates new potential mechanism of heart injury among patients infected with SARS-CoV-2. *Cardiovasc Res*. 2020; 116:1097–100. <https://doi.org/10.1093/cvr/cvaa078> PMID: 32227090
33. Jing Y, Run-Qian L, Hao-Ran W, Hao-Ran C, Ya-Bin L, Yang G, et al. Potential influence of COVID-19/ACE2 on the female reproductive system. *Mol Hum Reprod*. 2020; 26:367–73. <https://doi.org/10.1093/molehr/gaaa030> PMID: 32365180
34. Subramanian A, Vernon KA, Slyper M, Waldman J, Luecken MD, Gosik K, et al. RAAS blockade, kidney disease, and expression of ACE2, the entry receptor for SARS-CoV-2, in kidney epithelial and endothelial cells. *bioRxiv*. 2020. <https://doi.org/10.1101/2020.06.23.167098>
35. Kachuri L, Francis SS, Morrison M, Wendt GA, Bossé Y, Cavazos TB, et al. The landscape of host genetic factors involved in infection to common viruses and SARS-CoV-2. *medRxiv*. 2020. <https://doi.org/10.1101/2020.05.01.20088054> PMID: 32511533
36. Hoffmann M, Hoffman-Winkler H, Pohlmann S. Activation of Viruses by Host Proteases. Böttcher-Friebertshäuser E, Garten W, Klenk HD, editors. Springer; 2018. p. 71–98.
37. Ghosh S, Dellibovi-Ragheb TA, Kerviel A, Pak E, Qiu Q, Fisher M, et al.  $\beta$ -Coronaviruses Use Lysosomes for Egress Instead of the Biosynthetic Secretory Pathway. *Cell*. 2020. <https://doi.org/10.1016/j.cell.2020.10.039> PMID: 33157038

38. Kawase M, Shirato K, van der Hoek L, Taguchi F, Matsuyama S. Simultaneous treatment of human bronchial epithelial cells with serine and cysteine protease inhibitors prevents severe acute respiratory syndrome coronavirus entry. *J Virol*. 2012; 86:6537–6545. <https://doi.org/10.1128/JVI.00094-12> PMID: 22496216
39. Dittmar M, Lee JS, Whig K, Segrist E, Li M, Jurado K, et al. Drug repurposing screens reveal FDA approved drugs active against SARS-Cov-2. *bioRxiv*. 2020. <https://doi.org/10.1101/2020.06.19.161042>
40. Heiser K, McLean PF, Davis CT, Fogelson B, Gordon HB, Jacobson P, et al. Identification of potential treatments for COVID-19 through artificial intelligence-enabled phenomic analysis of human cells infected with SARS-CoV-2. *bioRxiv*. 2020. <https://doi.org/10.1101/2020.04.21.054387>
41. Mirabelli C, Wotring JW, Zhang CJ, McCarty SM, Fursmidt R, Frum T, et al. Morphological Cell Profiling of SARS-CoV-2 Infection Identifies Drug Repurposing Candidates for COVID-19. *bioRxiv*. 2020. <https://doi.org/10.1101/2020.05.27.117184> PMID: 32577649
42. Riva L, Yuan S, Yin X, Martin-Sancho L, Matsunaga N, Burgstaller-Muehlbacher S, et al. A Large-scale Drug Repositioning Survey for SARS-CoV-2 Antivirals. *bioRxiv*. 2020. <https://doi.org/10.1101/2020.04.16.044016> PMID: 32511357
43. Mirabelli C, Wotring JW, Zhang CJ, McCarty SM, Fursmidt R, Frum T, et al. Morphological Cell Profiling of SARS-CoV-2 Infection Identifies Drug Repurposing Candidates for COVID-19. *bioRxiv*. 2020. <https://doi.org/10.1101/2020.05.27.117184> PMID: 32577649
44. Kang Y-L, Chou Y-Y, Rothlauf PW, Liu Z, Soh TK, Cureton D, et al. Inhibition of PIKfyve kinase prevents infection 1 by EBOV and SARS2-CoV-2. *bioRxiv*. 2020. <https://doi.org/10.1101/2020.04.21.053058> PMID: 32511398
45. Ou X, Liu Y, Lei X, Li P, Mi D, Ren L, et al. Characterization of spike glycoprotein of SARS-CoV-2 on virus entry and its immune cross-reactivity with SARS-CoV. *Nat Commun*. 2020; 11:1620. <https://doi.org/10.1038/s41467-020-15562-9> PMID: 32221306
46. Hoffmann M, Kleine-Weber H, Pohlmann S. A Multibasic Cleavage Site in the Spike Protein of SARS-CoV-2 Is Essential for Infection of Human Lung Cells. *Mol Cell*. 2020. <https://doi.org/10.1016/j.molcel.2020.04.022> PMID: 32362314
47. Menachery VD, Dinnon KH, Yount BL Jr, McAnarney ET, Gralinski LE, Hale A, et al. Trypsin Treatment Unlocks Barrier for Zoonotic Bat Coronavirus Infection. *J Virol*. 2020; 94. <https://doi.org/10.1128/JVI.01774-19> PMID: 31801868
48. Simmons G, Bertram S, Glowacka I, Steffen I, Chaipan C, Agudelo J, et al. Different host cell proteases activate the SARS-coronavirus spike-protein for cell-cell and virus-cell fusion. *Virology*. 2011; 413:265–74. <https://doi.org/10.1016/j.virol.2011.02.020> PMID: 21435673
49. Yamamoto M, Kiso M, Sakai-Tagawa Y, Iwatsuki-Horimoto K, Imai M, Takeda M, et al. The Anticoagulant Nafamostat Potently Inhibits SARS-CoV-2 S Protein-Mediated Fusion in a Cell Fusion Assay System and Viral Infection In Vitro in a Cell-Type-Dependent Manner. *Viruses*. 2020; 12. <https://doi.org/10.3390/v12060629> PMID: 32532094
50. Shang J, Wan Y, Luo C, Ye G, Geng Q, Auerbach A, et al. Cell entry mechanisms of SARS-CoV-2. *Proc Natl Acad Sci U S A*. 2020. <https://doi.org/10.1073/pnas.2003138117> PMID: 32376634
51. Shirato K, Kawase M, Matsuyama S. Middle East respiratory syndrome coronavirus infection mediated by the transmembrane serine protease TMPRSS2. *J Virol*. 2013; 87:12552–61. <https://doi.org/10.1128/JVI.01890-13> PMID: 24027332
52. Shirato K, Kawase M, Matsuyama S. Wild-type human coronaviruses prefer cell-surface TMPRSS2 to endosomal cathepsins for cell entry. *Virology*. 2018; 517:9–15. <https://doi.org/10.1016/j.virol.2017.11.012> PMID: 29217279
53. Chu H, Chan JF-W, Yuen TT-T, Shuai H, Yuan S, Wang Y, et al. Comparative tropism, replication kinetics, and cell damage profiling of SARS-CoV-2 and SARS-CoV with implications for clinical manifestations, transmissibility, and laboratory studies of COVID-19: an observational study. *Lancet Microbe*. 2020; 1:e14–23. [https://doi.org/10.1016/S2666-5247\(20\)30004-5](https://doi.org/10.1016/S2666-5247(20)30004-5) PMID: 32835326
54. Chan JF, Chan K-H, Choi GK-Y, To KK-W, Tse H, Cai J-P, et al. Differential cell line susceptibility to the emerging novel human betacoronavirus 2c EMC/2012: implications for disease pathogenesis and clinical manifestation. *J Infect Dis*. 2013; 207:1743–52. <https://doi.org/10.1093/infdis/jit123> PMID: 23532101
55. Iwata-Yoshikawa N, Okamura T, Shimizu Y, Kotani O, Sato H, Sekimukai H, et al. Acute Respiratory Infection in Human Dipeptidyl Peptidase 4-Transgenic Mice Infected with Middle East Respiratory Syndrome Coronavirus. *J Virol*. 2019; 93. <https://doi.org/10.1128/JVI.01818-18> PMID: 30626685
56. Zhou Y, Vedantham P, Lu K, Agudelo J, Carrion R Jr, Nunneley JW, et al. Protease inhibitors targeting coronavirus and filovirus entry. *Antivir Res*. 2015; 116:76–84. <https://doi.org/10.1016/j.antiviral.2015.01.011> PMID: 25666761

57. Bittmann S, Weissenstein A, Villalon G, Moschuring-Alieva E, Luchter E. Simultaneous Treatment of COVID-19 With Serine Protease Inhibitor Camostat and/or Cathepsin L Inhibitor? *J Clin Med Res*. 2020; 12:320–2. <https://doi.org/10.14740/jocmr4161> PMID: 32489508
58. Paoloni-Giacobino A, Chen H, Peitsch MC, Rossier C, Antonarakis SE. Cloning of the TMPRSS2 gene, which encodes a novel serine protease with transmembrane, LDLRA, and SRCR domains and maps to 21q22.3. *Genomics*. 1997; 44:309–20. <https://doi.org/10.1006/geno.1997.4845> PMID: 9325052
59. Lin B, Ferguson C, White JT, Wang S, Vessella R, True LD, et al. Prostate-localized and androgen-regulated expression of the membrane-bound serine protease TMPRSS2. *Cancer Res*. 1999; 59:4180–4. PMID: 10485450
60. Afar D, Vivanco I, Hubert RS, Kuo J, Chen E, Saffran DC, et al. Catalytic Cleavage of the Androgen-regulated TMPRSS2 Protease Results in Its Secretion by Prostate and Prostate Cancer Epithelia. *Cancer Res*. 2001; 61:1686–92. PMID: 11245484
61. Kim TS, Heinlein C, Hackman RC, Nelson PS. Phenotypic analysis of mice lacking the Tmprss2-encoded protease. *Mol Cell Biol*. 2006; 26:965–75. <https://doi.org/10.1128/MCB.26.3.965-975.2006> PMID: 16428450
62. Glowacka I, Bertram S, Müller MA, Allen P, Soilleux E, Pfefferle S, et al. Evidence that TMPRSS2 activates the severe acute respiratory syndrome coronavirus spike protein for membrane fusion and reduces viral control by the humoral immune response. *J Virol*. 2011; 85:4122–34. <https://doi.org/10.1128/JVI.02232-10> PMID: 21325420
63. Hasan A, Paray BA, Hussain A, Qadir FA, Attar F, Aziz FM, et al. A review on the cleavage priming of the spike protein on coronavirus by angiotensin-converting enzyme-2 and furin. *J Biomol Struct Dyn*. 2020:1–9. <https://doi.org/10.1080/07391102.2020.1754293> PMID: 32274964
64. Coutard B, Valle C, de Lamballerie X, Canard B, Seidah NG, Decroly E. The spike glycoprotein of the new coronavirus 2019-nCoV contains a furin-like cleavage site absent in CoV of the same clade. *Antivir Res*. 2020; 176:104742–2. <https://doi.org/10.1016/j.antiviral.2020.104742> PMID: 32057769
65. Ogando NS, Dalebout TJ, Zevenhoven-Dobbe JC, Limpens RWAL, van der Meer Y, Caly L, et al. SARS-coronavirus-2 replication in Vero E6 cells: replication kinetics, rapid adaptation and cytopathology. *bioRxiv*. 2020. <https://doi.org/10.1099/jgv.0.001453> PMID: 32568027
66. Kleine-Weber H, Elzayat MT, Hoffmann M, Pohlmann S. Functional analysis of potential cleavage sites in the MERS-coronavirus spike protein. *Sci Rep*. 2018; 8:16597. <https://doi.org/10.1038/s41598-018-34859-w> PMID: 30413791
67. Follis KE, York J, Nunberg JH. Furin cleavage of the SARS coronavirus spike glycoprotein enhances cell-cell fusion but does not affect virion entry. *Virology*. 2006; 350:358–69. <https://doi.org/10.1016/j.virol.2006.02.003> PMID: 16519916
68. Cantuti-Castelvetri L, Ojha R, Pedro LD, Djannatian M, Franz J, Kuivanen S, et al. Neuropilin-1 facilitates SARS-CoV-2 cell entry and infectivity. *Science*. 2020; 370:856–60. <https://doi.org/10.1126/science.abd2985> PMID: 33082293
69. Daly JL, Simonetti B, Klein K, Chen K-E, Kavanagh Williamson M, Antón-Plágaro C, et al. Neuropilin-1 is a host factor for SARS-CoV-2 infection. *Science*. 2020; 370:861–5. <https://doi.org/10.1126/science.abd3072> PMID: 33082294
70. Johnson BA, Xie X, Kalveram B, Lokugamage KG, Muruato A, Zou J, et al. Furin Cleavage Site Is Key to SARS-CoV-2 Pathogenesis. *bioRxiv*. 2020. <https://doi.org/10.1101/2020.08.26.268854> PMID: 32869021
71. Moutal A, Martin LF, Boinon L, Gomez K, Ran D, Zhou Y, et al. SARS-CoV-2 Spike protein co-opts VEGF-A/Neuropilin-1 receptor signaling to induce analgesia. *Pain*. 2020. <https://doi.org/10.1101/2020.07.17.209288> PMID: 32869019
72. Bestle D, Heindl MR, Limburg H, Van Lam van T, Pilgram O, Moulton H, et al. TMPRSS2 and furin are both essential for proteolytic activation 1 and spread of SARS2 CoV-2 in human airway epithelial cells and provide promising drug targets. *bioRxiv*. 2020.
73. Rossi A, Deveraux Q, Turk B, Sali A. Comprehensive search for cysteine cathepsins in the human genome. *Biol Chem*. 2004; 385:363–72. <https://doi.org/10.1515/BC.2004.040> PMID: 15195995
74. Simmons G, Gosalia DN, Rennekamp AJ, Reeves JD, Diamond SL, Bates P. Inhibitors of cathepsin L prevent severe acute respiratory syndrome coronavirus entry. *Proc Natl Acad Sci U S A*. 2005; 102:11876–81. <https://doi.org/10.1073/pnas.0505577102> PMID: 16081529
75. Matsuyama S, Taguchi F. Two-step conformational changes in a coronavirus envelope glycoprotein mediated by receptor binding and proteolysis. *J Virol*. 2009; 83:11133–41. <https://doi.org/10.1128/JVI.00959-09> PMID: 19706706

76. Bojkova D, Klann K, Koch B, Widera M, Krause D, Ciesek S, et al. Proteomics of SARS-CoV-2-infected host cells reveals therapy targets. *Nature*. 2020. <https://doi.org/10.1038/s41586-020-2332-7> PMID: 32408336
77. Ellinger B, Bojkova D, Zaliani A, Cinatl J, Claussen C, Westhaus S, et al. Identification of inhibitors of SARS-CoV-2 in-vitro cellular toxicity in human (Caco-2) cells using a large scale drug repurposing collection. 2020. <https://doi.org/10.21203/rs.3.rs-23951/v1>
78. Wang G, Deval J, Hong J, Dyatkina N, Prhavic M, Taylor J, et al. Discovery of 4'-chloromethyl-2'-deoxy-3',5'-di-O-isobutyryl-2'-fluorocytidine (ALS-8176), a first-in-class RSV polymerase inhibitor for treatment of human respiratory syncytial virus infection. *J Med Chem*. 2015; 58:1862–78. <https://doi.org/10.1021/jm5017279> PMID: 25667954
79. Siegel D, Hui HC, Doerffler E, Clarke MO, Chun K, Zhang L, et al. Discovery and Synthesis of a Phosphoramidate Prodrug of a Pyrrolo[2,1-f][triazin-4-amino] Adenine C-Nucleoside (GS-5734) for the Treatment of Ebola and Emerging Viruses. *J Med Chem*. 2017; 60:1648–61. <https://doi.org/10.1021/acs.jmedchem.6b01594> PMID: 28124907
80. Pardo J, Shukla AM, Chamarthi G, Gupte A. The journey of remdesivir: from Ebola to COVID-19. *Drugs Context*. 2020; 9. <https://doi.org/10.7573/dic.2020-4-14> PMID: 32547625
81. Remdesivir Emergency Use Authorization Fact Sheet. Gilead Sciences, Inc; 2020.
82. Mehellou Y, Rattan HS, Balzarini J. The ProTide Prodrug Technology: From the Concept to the Clinic. *J Med Chem*. 2018; 61:2211–26. <https://doi.org/10.1021/acs.jmedchem.7b00734> PMID: 28792763
83. Boswell-Casteel RC, Hays FA. Equilibrative nucleoside transporters—A review. *Nucleosides Nucleotides Nucleic Acids*. 2017; 36:7–30. <https://doi.org/10.1080/15257770.2016.1210805> PMID: 27759477
84. Pastor-Anglada M, Perez-Torras S. Who Is Who in Adenosine Transport. *Front Pharmacol*. 2018; 9:627. <https://doi.org/10.3389/fphar.2018.00627> PMID: 29962948
85. Smee DF, McKernan PA, Nord LD, Willis RC, Petrie CR, Riley TM, et al. Novel pyrazolo[3,4-d]pyrimidine nucleoside analog with broad-spectrum antiviral activity. *Antimicrob Agents Chemother*. 1987; 31:1535–41. <https://doi.org/10.1128/aac.31.10.1535> PMID: 3435102
86. Taylor R, Kotian P, Warren T, Panchal R, Bavari S, Julander J, et al. BCX4430—A broad-spectrum antiviral adenosine nucleoside analog under development for the treatment of Ebola virus disease. *J Infect Public Health*. 2016; 9:220–6. <https://doi.org/10.1016/j.jiph.2016.04.002> PMID: 27095300
87. Dousson CB. Current and future use of nucleo(s)tide prodrugs in the treatment of hepatitis C virus infection. *Antivir Chem Chemother*. 2018; 26:2040206618756430. <https://doi.org/10.1177/2040206618756430> PMID: 29463095
88. Qi F, Qian S, Zhang S, Zhang Z. Single cell RNA sequencing of 13 human tissues identify cell types and receptors of human coronaviruses. *Biochem Biophys Res Commun*. 2020; 526:135–40. <https://doi.org/10.1016/j.bbrc.2020.03.044> PMID: 32199615
89. Zou X, Chen K, Zou J, Han P, Hao J, Han Z. Single-cell RNA-seq data analysis on the receptor ACE2 expression reveals the potential risk of different human organs vulnerable to 2019-nCoV infection. *Front Med*. 2020; 14:185–92. <https://doi.org/10.1007/s11684-020-0754-0> PMID: 32170560
90. Ravindra NG, Alfajaro MM, Gasque V, Habet V, Wei J, Filler RB, et al. Single-cell longitudinal analysis of SARS-CoV-2 infection in human bronchial epithelial cells. *bioRxiv*. 2020. <https://doi.org/10.1101/2020.05.06.081695> PMID: 32511382
91. Bertram S, Heurich A, Lavender H, Gierer S, Danisch S, Perin P, et al. Influenza and SARS-coronavirus activating proteases TMPRSS2 and HAT are expressed at multiple sites in human respiratory and gastrointestinal tracts. *PLoS ONE*. 2012; 7:e35876. <https://doi.org/10.1371/journal.pone.0035876> PMID: 22558251
92. Sungnak W, Huang N, Bécavin C, Berg M, Queen R, Litvinukova M, et al. SARS-CoV-2 entry factors are highly expressed in nasal epithelial cells together with innate immune genes. *Nat Med*. 2020; 26:681–7. <https://doi.org/10.1038/s41591-020-0868-6> PMID: 32327758
93. Clevers H. Modeling Development and Disease with Organoids. *Cell*. 2016; 165:1586–97. <https://doi.org/10.1016/j.cell.2016.05.082> PMID: 27315476
94. Han Y, Yang L, Duan X, Duan F, Nilsson-Payant BE, Yaron TM, et al. Identification of Candidate COVID-19 Therapeutics using hPSC-derived Lung Organoids. *bioRxiv*. 2020. <https://doi.org/10.1101/2020.05.05.079095> PMID: 32511403
95. Wan YL, Li J, Shen L, Zou Y, Hou L, Zhu L, et al. Enteric involvement in hospitalised patients with COVID-19 outside Wuhan. *Lancet Gastroenterol Hepatol*. 2020; 5:534–5. [https://doi.org/10.1016/S2468-1253\(20\)30118-7](https://doi.org/10.1016/S2468-1253(20)30118-7) PMID: 32304638



96. Lin L, Jiang X, Zhang Z, Huang S, Zhang Z, Fang Z, et al. Gastrointestinal symptoms of 95 cases with SARS-CoV-2 infection. *Gut*. 2020; 69:997–1001. <https://doi.org/10.1136/gutjnl-2020-321013> PMID: 32241899
97. Mohapatra S, Menon NG, Mohapatra G, Pisharody L, Pattnaik A, Menon NG, et al. The novel SARS-CoV-2 pandemic: Possible environmental transmission, detection, persistence and fate during wastewater and water treatment. *Sci Total Environ*. 2020;142746. <https://doi.org/10.1016/j.scitotenv.2020.142746> PMID: 33092831
98. Zhong P, Xu J, Yang D, Shen Y, Wang L, Feng Y, et al. COVID-19-associated gastrointestinal and liver injury: clinical features and potential mechanisms. *Signal Transduct Target Ther*. 2020; 5:256. <https://doi.org/10.1038/s41392-020-00373-7> PMID: 33139693
99. Leung WK, To K-F, Chan PKS, Chan HLY, Wu AKL, Lee N, et al. Enteric involvement of severe acute respiratory syndrome-associated coronavirus infection. *Gastroenterology*. 2003; 125:1011–7. [https://doi.org/10.1016/s0016-5085\(03\)01215-0](https://doi.org/10.1016/s0016-5085(03)01215-0) PMID: 14517783
100. Zhou J, Li C, Zhao G, Chu H, Wang D, Yan HH-N, et al. Human intestinal tract serves as an alternative infection route for Middle East respiratory syndrome coronavirus. *Sci Adv*. 2017; 3. <https://doi.org/10.1126/sciadv.aao4966> PMID: 29152574
101. Xiao F, Tang M, Zheng X, Liu Y, Li X, Shan H. Evidence for Gastrointestinal Infection of SARS-CoV-2. *Gastroenterology*. 2020; 158:1831–1833. <https://doi.org/10.1053/j.gastro.2020.02.055> PMID: 32142773
102. Stanifer ML, Kee C, Cortese M, Zumaran CM, Triana S, Mukenhim M, et al. Critical role of type III interferon in controlling SARS-CoV-2 infection, replication and spread in primary human intestinal epithelial cells. *bioRxiv*. 2020. <https://doi.org/10.1101/2020.04.24.059667>
103. Zang R, Gomez Castro MF, McCune BT, Zeng Q, Rothlauf PW, Sonnek NM, et al. TMPRSS2 and TMPRSS4 promote SARS-CoV-2 infection of human small intestinal enterocytes. *Sci Immunol*. 2020; 5. <https://doi.org/10.1126/sciimmunol.abc3582> PMID: 32404436
104. Johansen MD, Irving A, Montagutelli X, Tate MD, Rudloff I, Nold MF, et al. Animal and translational models of SARS-CoV-2 infection and COVID-19. *Mucosal Immunol*. 2020; 13:877–91. <https://doi.org/10.1038/s41385-020-00340-z> PMID: 32820248
105. Pandey K, Acharya A, Mohan M, Ng CL, Reid SP, Byrareddy SN. Animal Models for SARS-CoV-2 research: A Comprehensive Literature Review. *Transbound Emerg Dis*. 2020. <https://doi.org/10.1111/tbed.13907> PMID: 33128861
106. Tay MZ, Poh CM, Renia L, MacAry PA, Ng LFP. The trinity of COVID-19: immunity, inflammation and intervention. *Nat Rev Immunol*. 2020; 20:363–74. <https://doi.org/10.1038/s41577-020-0311-8> PMID: 32346093
107. Kuri-Cervantes L, Pampena MB, Meng W, Rosenfeld AM, Ittner CAG, Weisman AR, et al. Comprehensive mapping of immune perturbations associated with severe COVID-19. *Sci Immunol*. 2020; 5. <https://doi.org/10.1126/sciimmunol.abd7114> PMID: 32669287
108. Lee S, Channappanavar R, Kanneganti TD. Coronaviruses: Innate Immunity, Inflammasome Activation, Inflammatory Cell Death, and Cytokines. *Trends Immunol*. 2020. <https://doi.org/10.1016/j.it.2020.10.005> PMID: 33153908
109. Zhang D, Guo R, Lei L, Liu H, Wang Y, Wang Y, et al. COVID-19 infection induces readily detectable morphological and inflammation-related phenotypic changes in peripheral blood monocytes, the severity of which correlate with patient outcome. *medRxiv*. 2020. <https://doi.org/10.1101/2020.03.24.20042655>
110. Feng Z, Diao B, Wang R, Wang G, Wang C, Tan Y, et al. The Novel Severe Acute Respiratory Syndrome Coronavirus 2 (SARS-CoV-2) Directly Decimates Human Spleens and Lymph Nodes. *medRxiv*. 2020. <https://doi.org/10.1101/2020.03.27.20045427>
111. Yilla M, Harcourt BH, Hickman CJ, McGrew M, Tamin A, Goldsmith CS, et al. SARS-coronavirus replication in human peripheral monocytes/macrophages. *Virus Res*. 2005; 107:93–101. <https://doi.org/10.1016/j.virusres.2004.09.004> PMID: 15567038
112. Ziegler CGK, Allon SJ, Nyquist SK, Mbano IM, Miao VN, Tzouanas CN, et al. SARS-CoV-2 Receptor ACE2 Is an Interferon-Stimulated Gene in Human Airway Epithelial Cells and Is Detected in Specific Cell Subsets across Tissues. *Cell*. 2020; 181:1016, e1019–35. <https://doi.org/10.1016/j.cell.2020.04.035> PMID: 32413319
113. Kim JY, Kim WJ, Kim H, Suk K, Lee WH. The Stimulation of CD147 Induces MMP-9 Expression through ERK and NF-kappaB in Macrophages: Implication for Atherosclerosis. *Immune Netw*. 2009; 9:90–7. <https://doi.org/10.4110/in.2009.9.3.90> PMID: 20107538
114. Xi J, Xu K, Jiang P, Lian J, Hao S, Yao H, et al. Virus strain of a mild COVID-19 patient in Hangzhou representing a new trend in SARS-CoV-2 evolution related to Furin cleavage site. *medRxiv*. 2020. <https://doi.org/10.1101/2020.03.10.20033944>

115. Pontelli MC, Castro IA, Martins RB, Veras FP, La Serra L, Nascimento DC, et al. Infection of human lymphomononuclear cells by SARS-CoV-2. *bioRxiv*. 2020. <https://doi.org/10.1101/2020.07.28.225912>
116. Codo AC, Gastão Davanzo G, de Brito Monteiro L, de Souza GF, Muraro SP, Virgilio-da-Silva JV, et al. Elevated Glucose Levels Favor SARS-CoV-2 Infection and Monocyte Response through a HIF-1alpha/Glycolysis-Dependent Axis, e435. *Cell Metab*. 2020; 32:437–46. <https://doi.org/10.1016/j.cmet.2020.07.007> PMID: 32697943
117. Xie X, Muruato AE, Zhang X, Lokugamage KG, Fontes-Garfias CR, Zou J, et al. A nanoluciferase SARS-CoV-2 for rapid neutralization testing and screening of anti-infective drugs for COVID-19. *bioRxiv*. 2020. <https://doi.org/10.1101/2020.06.22.165712> PMID: 32607511
